# Supplementary material for: Device performance and strain effect of sub-5 nm monolayer InP transistors
Source: Royal Society of Chemistry journal article supplement (doi:10.1039/d1tc03814a), 2022-01-01
Supplement: d1tc03814a1.pdf [file d1tc03814a1.pdf]

# Supporting Information

## Device Performance and Strain Effect of Sub-5 nm Monolayer InP Transistors

Linqiang Xu<sup>1</sup>, Ruge Quhe<sup>2</sup>, Qihui Li<sup>1</sup>, Shiqi Liu<sup>1</sup>, Jie Yang<sup>1</sup>, Chen Yang<sup>1</sup>, Bowen Shi<sup>1</sup>,  
Hao Tang<sup>1</sup>, Ying Li<sup>1</sup>, Xiaotian Sun<sup>6</sup>, JinBo Yang<sup>1,3,4,5\*</sup>, Jing Lu<sup>1,3,4,5\*</sup>

<sup>1</sup>State Key Laboratory of Mesoscopic Physics and Department of Physics, Peking University,  
Beijing 100871, P. R. China

<sup>2</sup>State Key Laboratory of Information Photonics and Optical Communications and School of  
Science, Beijing University of Posts and Telecommunications, Beijing 100876, P. R. China

<sup>3</sup>Collaborative Innovation Center of Quantum Matter, Beijing 100871, P. R. China

<sup>4</sup>Beijing Key Laboratory for Magnetoelectric Materials and Devices (BKL-MEMD), Beijing  
100871, P. R. China

<sup>5</sup>Peking University Yangtze Delta Institute of Optoelectronics Nantong, Jiangsu 226010, P.  
R. China

<sup>6</sup>College of Chemistry and Chemical Engineering, and Henan Key Laboratory of Function-  
Oriented Porous Materials, Luoyang Normal University, Luoyang 471934, P. R. China

Email: jinglu@pku.edu.cn

### Section I: Comparison between SG and DG ML InP MOSFETs

The transfer characteristics of the single-gated (SG) and double-gated (DG) *n*-type ML InP MOSFETs at  $L_g = 5$  nm and  $UL = 0$  nm with the doping concentration of  $5 \times 10^{12}$  cm<sup>-2</sup> are calculated for comparison, as shown in Figure S1. The HP  $I_{on}$  of the SG ML InP MOSFET (575  $\mu\text{A}/\mu\text{m}$ ) is unable to reach the ITRS requirement (900  $\mu\text{A}/\mu\text{m}$ ). By contrast, the HP  $I_{on}$  of the DG ML InP MOSFET (1413  $\mu\text{A}/\mu\text{m}$ ) fulfills the ITRS demand and is two times larger than the SG counterpart. Besides, the DG ML InP MOSFET has a smaller SS than the SG ML InP MOSFET (117/150 mV/dec for the DG/SG ML InP MOSFET), which means better gate controllability. Therefore, the device performance of the DG ML InP MOSFET significantly surpasses the SG ML InP MOSFET. Experimentally, the DG ultra-thin GaAs FET shows higher  $I_{on}/I_{off}$  ( $10^6$ ) and smaller SS (300 mV/dec) than the SG counterpart ( $10^5$  for  $I_{on}/I_{off}$ , 400 mV/dec for SS) at the same channel length and drain voltage.<sup>1</sup> This result also proves the better device performance of the DG FET than the SG FET.

Compared with the single gate, the double gate covers more area of the channel, leading to better gate controllability and thus better device performance. This can also be illustrated by the natural length  $\lambda$ . As defined in the ‘‘Introduction’’ section,  $\lambda$  can be calculated by the formula  $\lambda = \sqrt{\frac{t_{ch}t_{ox}\epsilon_{ch}}{N\epsilon_{ox}}}$ , in which  $t_{ch}$  ( $t_{ox}$ ),  $\epsilon_{ch}$  ( $\epsilon_{ox}$ ), and  $N$  are the channel (gate oxide) thickness, channel (gate oxide) dielectric constant, and gate numbers, respectively. A better gate controllability generally requires a smaller  $\lambda$ . Compared with the SG FET, the DG FET possesses more gates, which means a larger  $N$  and thus a smaller  $\lambda$ . Therefore, the DG device has better gate controllability than the SG device.

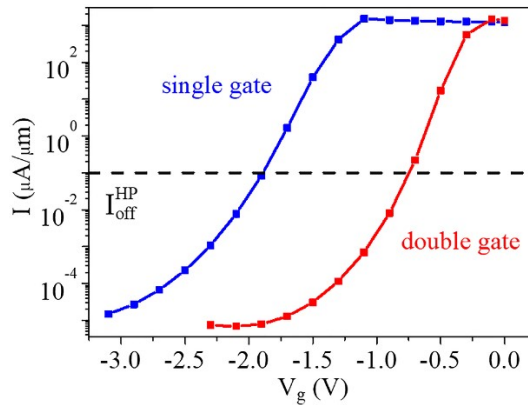

**Figure S1.** Comparison of the transfer characteristics between SG and DG *n*-type ML InP

MOSFETs at  $L_g = 5$  nm and  $UL = 0$  nm with the doping concentration of  $5 \times 10^{12}$  cm<sup>-2</sup>.

## Section II: Atomic Compensation Charge method

The electron density of the system:

$$\rho(\mathbf{r}) = \Delta\rho(\mathbf{r}) + \sum_i^{N_{atoms}} \rho_i^{atom}(\mathbf{r}) \quad (1)$$

Where  $\Delta\rho(\mathbf{r})$  is the electron difference density, and  $\sum_i^{N_{atoms}} \rho_i^{atom}(\mathbf{r})$  is the sum of the densities associated with the individual atom. Based on the following two formulas, the integral of

$\Delta\rho(\mathbf{r})$  and  $\sum_i^{N_{atoms}} \rho_i^{atom}(\mathbf{r})$  can lead to  $N$  and  $\tilde{N}$ , respectively.

$$\int \sum_i^{N_{atoms}} \rho_i^{atom}(\mathbf{r}) = N \quad (2)$$

$$\int \Delta\rho(\mathbf{r}) = \tilde{N} \quad (3)$$

in which  $N$  and  $\tilde{N}$  are the total number of electrons and extra electrons, respectively. Using the atomic compensation charge method,  $\tilde{N}$  is set to zero, and the extra charge is introduced by modifying  $N$ . The density of the  $i$ -th atom is rescaled by a factor:

$$c_i = \frac{\tilde{n}_i + n_i}{n_i}$$

(4)

Where  $n_i$  is the number of valence electrons, and  $\tilde{n}_i$  is the extra compensation charge associated with the isolated  $i$ -th atom. The individual values of  $\tilde{n}_i$ , and therefore the individual coefficients  $c_i$ , can be set arbitrarily from atom to atom, even within the same chemical species. For sake of comparison, we assume here that  $\tilde{n}_i$  and  $c_i$  are the same for all the atoms. In this case, the integral of the total density can be expressed as a sum over the individual densities:

$$\int \rho(\mathbf{r})d\mathbf{r} = \sum_i^{N_{atoms}} \int c_i \cdot \rho_i^{atom}(\mathbf{r})d\mathbf{r}$$

(5)

### Section III: Comparison between $n$ -type and $p$ -type ML InP MOSFETs

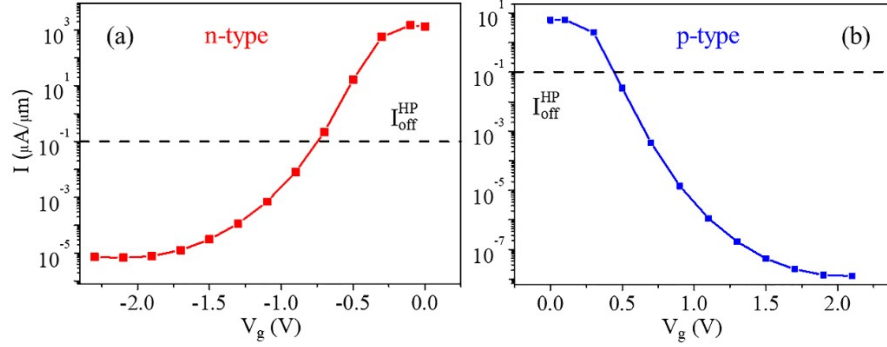

**Figure S2.** Transfer characteristics of the (a)  $n$ -type and (b)  $p$ -type ML InP MOSFETs at  $L_g = 5$  nm and  $UL = 0$  nm with the doping concentration of  $5 \times 10^{12}$  cm $^{-2}$ .

### Section IV: Illustration of Electron Transport Mechanism

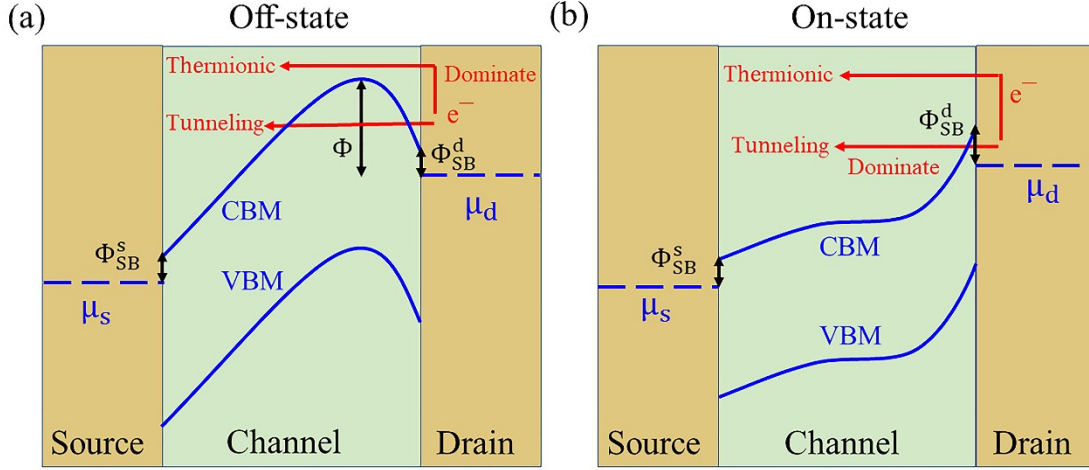

**Figure S3.** Schematic diagram of the electron transport mechanism at (a) off-state and (b) on-state. The thermionic emission and tunneling emission are the dominant mechanisms for the off-state and on-state, respectively.  $\Phi$  is the electron barrier height, and  $\Phi_{SB}^s$  ( $\Phi_{SB}^d$ ) is the Schottky barrier height at the source (drain)-channel interface.  $\mu_s$  ( $\mu_d$ ) and CBM (VBM) are the source (drain) electrochemical potential and conduction band minimum (valance band maximum), respectively.

### References

1. J.-P. Shim, S. K. Kim, H. Kim, G. Ju, H. Lim, S. Kim, H.-j. Kim, Double-gated ultra-thin-body

GaAs-on-insulator p-FETs on Si. *APL Mater.* **2018**, 6 (1), 016103.
